## 1 **Regional genomic heritability mapping for agronomic traits in sugarcane**

2  
3 Pedro Marcus Pereira Vidigal<sup>1</sup> (0000-0002-5116-9856), Mehdi Momen<sup>2,3</sup> (0000-0002-2562-  
4 2741), Paulo Mafra de Almeida Costa<sup>4</sup> (0000-0001-5190-2678), Márcio Henrique Pereira  
5 Barbosa<sup>5</sup> (0000-0002-5838-9579), Gota Morota<sup>2</sup> (0000-0002-3567-6911), Luiz Alexandre  
6 Peternelli<sup>6\*</sup> (0000-0002-7683-0583).

7  
8 <sup>1</sup> Universidade Federal de Viçosa (UFV), Núcleo de Análise de Biomoléculas (NuBioMol),  
9 Viçosa, Minas Gerais, Brazil;

10 <sup>2</sup> Virginia Polytechnic Institute and State University (Virginia Tech), Department of Animal  
11 and Poultry Sciences, Blacksburg, Virginia, USA;

12 <sup>3</sup> University of Wisconsin–Madison (UW-Madison), Department of Surgical Sciences, School  
13 of Veterinary Medicine, Madison, Wisconsin, USA;

14 <sup>4</sup> Instituto Federal de Educação, Ciência e Tecnologia Catarinense, Concórdia, Santa Catarina,  
15 Brazil;

16 <sup>5</sup> Universidade Federal de Viçosa (UFV), Department of Agronomy, Viçosa, Minas Gerais,  
17 Brazil;

18 <sup>6</sup> Universidade Federal de Viçosa (UFV), Department of Statistics, Viçosa, Minas Gerais,  
19 Brazil;

20  
21 \*Corresponding author: Luiz Alexandre Peternelli (0000-0002-7683-0583). E-mail:  
22 [peternelli@ufv.br](mailto:peternelli@ufv.br).

23  
24 **Keywords:** genotyping; GWAS; regional heritability mapping; single nucleotide  
25 polymorphism; sugarcane.

## 26 27 28 **Abstract**

29  
30 **Background.** The identification of genomic regions involved in agronomic traits is the  
31 primary concern for sugarcane breeders. Genome-wide association studies (GWAS) leverage  
32 the sequence variations to bridge phenotypes and genotypes. However, their effectiveness is  
33 limited in species with high ploidy and large genomes, such as sugarcane. As an alternative, a  
34 regional heritability mapping (RHM) method can be used to capture genetic signals that may  
35 be missed by GWAS by combining genetic variance from neighboring regions. We used  
36 RHM to screen the sugarcane genome aiming to identify regions with higher heritability  
37 associated with agronomic traits. We considered percentage of fiber in sugarcane bagasse  
38 (FB), apparent percentage of sugarcane sucrose (PC), tonnes of pol per hectare (TPH), and  
39 tonnes of stalks per hectare (TSH).

40 **Methods.** Sequence-capture data of 508 sugarcane (*Saccharum* spp.) clones from a breeding  
41 population under selection were processed for variant calling analysis using the sugarcane  
42 genome cultivar R570 as a reference. A set of 375,195 single nucleotide polymorphisms were  
43 selected after quality control. RHM was conducted by splitting the sugarcane genome into  
44 windows of 2 Mb length.

45 **Results.** We selected the windows explaining > 20% of the total genomic heritability for TPH  
46 (64 windows - 5,654 genes) and TSH (72 windows - 6,050 genes), and > 15% for PC (16  
47 windows - 1,517 genes) and FB (17 windows - 1,615 genes). The top five windows that  
48 explained the highest genomic heritability ranged from 20.8 to 24.6% for FB (629 genes),  
49 18.0 to 22.0% for PC (452 genes), 53.8 to 66.0% for TPH (705 genes), and 59.5 to 67.4% for  
50 TSH (413 genes). The functional annotation of genes included in those top five windows

51 revealed a set of genes that encode enzymes that integrate carbon metabolism, starch and  
52 sucrose metabolism, and phenylpropanoid biosynthesis pathways.

53 **Conclusions.** The selection of windows that explained the large proportions of genomic  
54 heritability allowed us to identify genomic regions containing a set of genes that are related to  
55 the agronomic traits in sugarcane. These windows spanned a region of 58.38Mb, which  
56 corresponds to 14.28% of the reference assembly in the sugarcane genome. We contend that  
57 RHM can be used as an alternative method for sugarcane breeders to reduce the complexity of  
58 the sugarcane genome.

59  
60

## 61 **1. Introduction**

62

63 Sugarcane (*Saccharum* spp.) is a perennial C<sub>4</sub> grass of the Poaceae family, which is an  
64 economically important crop for the sugar and biofuels industries. Its cultivars are multiplied  
65 through vegetative propagation and are primarily grown in tropical and subtropical regions  
66 (Barbosa et al., 2012).

67

68 Improvement of sugarcane is a challenging process guided by conventional methods, which  
69 demand time and is hindered by its genomic complexity (Barbosa et al., 2012). Due to its long  
70 production cycle, sugarcane breeding programs take at least 11 years to release a new cultivar  
71 (Barbosa et al., 2012; Peternelli et al., 2018). Sugarcane breeders also must deal with the  
72 complexity of the sugarcane genome that exceeds other crops, which is the product of  
73 interspecific hybridization between *Saccharum officinarum* and *S. spontaneum* originated  
74 from modern cultivars. These cultivars are highly heterozygous, aneuploid, and have large  
75 genomes with a variable number of chromosomes (Lu et al., 1994; D'Hont et al., 2001;  
76 Piperidis, Piperidis & D'Hont, 2010; Garsmeur et al., 2018).

77

78 High throughput sequencing technologies have been enabling significant advances in  
79 uncovering and understanding the genomic complexity of sugarcane. A comparison of the  
80 sugarcane genetic maps with other Poaceae species maps revealed microsynteny with the  
81 *Sorghum bicolor* genome (Figueira et al., 2012; Aitken et al., 2014; Yang et al., 2017).  
82 Analysis of transcriptomes further confirmed that sugarcane and sorghum transcripts share  
83 more than 90% of sequence identity (Nishiyama et al., 2014; Yang et al., 2017). Thus, the  
84 sorghum genome became the most suitable reference for sequence variation analysis in  
85 sugarcane and is of frequent use in linkage and quantitative trait loci (QTL) mapping.  
86 However, the recently released reference sequence of the sugarcane cultivar R570 monoploid  
87 genome (Garsmeur et al., 2018) opens a new opportunity for sugarcane geneticists. This  
88 reference is a high-quality sequence that represents the gene space of the sugarcane  
89 monoploid genome, which contains genes annotated in their genomic context with the  
90 respective regulatory elements.

91

92 Identification of genomic regions involved in agronomic traits related to yield and disease  
93 resistance by performing molecular marker-assisted selection is the primary concern for  
94 sugarcane breeders. To increase the resolution of single nucleotide polymorphism (SNP)  
95 genotyping, sequence-capture methods have been used as a powerful tool to assess sequence  
96 variation in target regions across the genomes and to reduce costs in comparison with whole-  
97 genome sequencing. Genome-wide association studies (GWAS) leverage these sequence  
98 variations to bridge phenotypes and genotypes. GWAS also exploit the high amount of  
99 linkage disequilibrium (LD) in sugarcane as a more suitable alternative for bi-parental QTL  
100 mapping (Raboin et al., 2008). However, many instances of linked markers still will not be

101 recognized due to the confounding effect of polyploidy of the sugarcane genome (Raboin et  
102 al., 2008).

103

104 Additionally, GWAS in high ploidy species, such as sugarcane, is also limited by high  
105 sequencing depth needed to call variants from the large genome and the difficulty in  
106 determining the dosage of markers (Meirmans, Liu & Van Tienderen, 2018). For instance,  
107 only a few significantly associated SNPs have been detected in agronomic traits (Yang et al.,  
108 2018; Fickett et al., 2019). As an alternative, a regional heritability mapping (RHM) method  
109 can be used to capture genetic signals that may be missed by GWAS by combining genetic  
110 variance from neighboring regions (Nagamine et al., 2012; Shirali et al., 2016; Resende et al.,  
111 2018). Here, we analyzed sequence-capture data of sugarcane clones from a breeding  
112 population under selection, which were phenotypically evaluated. We used the RHM method  
113 to identify genomic regions that explain significant additive genetic variance in agronomic  
114 traits by screening the whole sugarcane genome.

115

116

## 117 **2. Materials and Methods**

118

### 119 **2.1. Plant material**

120

121 The sugarcane clones analyzed in this study were selected from a breeding population of the  
122 Sugarcane Breeding Program (Programa de Melhoramento da Cana-de-Açúcar, PMGCA) at  
123 the Federal University of Viçosa (Universidade Federal de Viçosa, UFV). This population  
124 consisted of 508 clones from 100 half-sib families, originated from crossings between elite  
125 sugarcane clones and commercial cultivars.

126

127 These crossings were performed in 2010 at the Serra do Ouro's experimental station located  
128 in Murici (Alagoas, Brazil) (09°13' S, 35°50' W, 450 m altitude). The seedlings were  
129 produced at PMGCA's experimental station located in Oratórios (Minas Gerais, Brazil)  
130 (20°25' S, 42°48' W, 494 m altitude). The seedlings were conducted in the first phase trials  
131 (T1) performed in 2011 (plant cane) and 2012 (first ratoon). Sugarcane clones analyzed were  
132 originated from plants selected in T1 and advanced to the second phase trial (T2) in July  
133 2012, which was conducted in an augmented block design experiment (Federer &  
134 Raghavarao, 1975). In the T2 trial, the experimental plots consisted of one 4 m row with a  
135 spacing of 1 m between plots. The clones (unreplicated) and two common reference cultivars  
136 (checks replicated once each) were arranged in 49 augmented blocks. The reference cultivars  
137 were RB867515 (Barbosa et al., 2001) and SP80-1842, which are cultivated in large areas and  
138 commonly used as checks in breeding experiments in Brazil.

139

### 140 **2.2. Phenotypic data**

141

142 Sugarcane clones were phenotypically evaluated in plant cane in July 2013 after 12 months of  
143 growth. Ten stalks randomly taken from each plot were used for estimating the tonnes of  
144 stalks per hectare (TSH), percentage of fiber in sugarcane bagasse (FB), apparent percentage  
145 of sucrose in sugarcane (PC), and tonnes of pol per hectare (TPH).

146

147 TSH was obtained from the total number of stalks per row and the wet weight of 10 stalks  
148 determined with a dynamometer (Castro et al., 2016). FB was determined on a wet basis from  
149 a 500 g sample of the shredded stalk (Tanimoto, 1964; Legendre, 1992) as  $[FB(\%) = ((100$   
150  $\times DM) - (WM \times Brix)) / (5 \times (100 - Brix))]$ , where DM and WM are dry and wet mass of

151 the sample removed from a hydraulic press and Brix is the juice Brix measured by  
152 refractometer. The apparent percentage of sucrose in juice (polarization, POL) was measured  
153 by polarimetric determination after juice extraction from 500 g samples crushed in a hydraulic  
154 press (Schneider, 1979) and used to derive the apparent percentage of sucrose in sugarcane  
155 (PC), according to the following expression (Baffa et al., 2014):  $[PC (\%) = POL \times (1 - 0.01$   
156  $\times FB) \times (0.9961 - 0.0041 \times FB)]$ . The trait TPH, expressed as a percentage of apparent  
157 sucrose on a fresh weight basis, was estimated as  $[TPH (\%) = (TSH \times PC) / 100]$ .

158

### 159 **2.3. Statistical analysis of phenotypic data**

160

161 We analyzed the phenotypic data through the mixed model methodology using the software  
162 Selegen-REML/BLUP (Resende, 2016). Variance components were estimated by restricted  
163 maximum likelihood (REML), and the genotypic effects of the clones were predicted by  
164 BLUP. We used the following linear mixed model:

165

$$166 \mathbf{y} = \mathbf{1}\mu + \mathbf{Z}\mathbf{u} + \mathbf{W}\mathbf{b} + \mathbf{e},$$

167

168 where  $\mathbf{y}$  is the vector of phenotypic observations for each trait;  $\mathbf{1}$  is a vector of 1s;  $\mu$  is the  
169 overall mean;  $\mathbf{u} \sim N(\mathbf{0}, \mathbf{I}\sigma_u^2)$  is the vector of random genotypic effects;  $\mathbf{b} \sim N(\mathbf{0}, \mathbf{I}\sigma_b^2)$  is the  
170 vector of random block effects; and  $\mathbf{e} \sim N(\mathbf{0}, \mathbf{I}\sigma_e^2)$  is the vector of residuals.  $\mathbf{Z}$  and  $\mathbf{W}$  are  
171 incidence matrices relating the observations to the respective model effects.

172

173 The statistical significance of the effects was tested using the likelihood ratio test under the  
174 analysis of deviance theory (Resende, 2016). The predicted genotypic values ( $\hat{\mu} + \hat{u}_i$ ) of the  
175 clones ( $i = 1$  to  $n$ ) are listed in Table S1 and were considered as response variables in the  
176 RHM analysis.

177

### 178 **2.4. Genotypic data: Genomic DNA sequencing**

179

180 The total genomic DNA of sugarcane clones was extracted using the DNeasy Plant Mini Kit  
181 of Qiagen<sup>®</sup> following the manufacturer's guidelines. The genomic libraries were produced  
182 and sequenced by RAPiD Genomics (Florida, USA). In this sequencing, the single-end  
183 libraries were built using a capture-seq methodology (Neves et al., 2013), which includes a set  
184 of probes to capture non-repetitive and evenly distributed sequences in the sugarcane genome.

185

186 Briefly, a set of 50,000 unique sequences was identified from: i) existing expressed sequence  
187 tags (ESTs) from public sugarcane cDNA libraries and ii) whole-shotgun genome sequences  
188 available publicly, consistently distributed in the genome and assuming synteny to the  
189 sorghum genome. Biotinylated 120-mer probes that complement a segment of each of the  
190 50,000 target regions of the sugarcane genome were synthesized and were utilized to capture  
191 sequences at each target locus. The sequencing yielded a dataset of 4.77 billion reads  
192 containing sequences with 100nt or 150nt in length.

193

### 194 **2.5. Bioinformatic and genetic analysis of genotypic data**

195

#### 196 **2.5.1. Reference genome**

197

198 To evaluate the sequence variation, we selected the genome of sugarcane cultivar R570  
199 (Grasmieur et al. 2018) as a reference, which is available at Sugarcane Genome Hub  
200 (<http://sugarcane-genome.cirad.fr/organism/R570-Sugarcane/cultivar>). This genome is a

201 Single Tilling Path (STP) assembly of 408.94Mb containing ten chromosomes and 24,341  
202 annotated genes. The unplaced contigs were not considered for the mapping analysis.

203

### 204 2.5.2. Mapping analysis

205

206 The raw reads of each capture-seq library were first trimmed to remove sequence adapters and  
207 poorly sequenced regions using Trimmomatic version 0.38 (Bolger, Lohse & Usadel, 2014).  
208 Trimmed reads were mapped to the reference genome using the BWA-MEM algorithm of  
209 BWA version 0.7.17 (<http://bio-bwa.sourceforge.net/>) (Li & Durbin, 2009). A flag identifying  
210 the several sugarcane clones was added to each mapping file. Then, the Sequence Alignment  
211 Map files were processed using SortSam, MarkDuplicates, and BuildBamIndex tools in  
212 Picard version 2.18.27 (<https://github.com/broadinstitute/picard/>). As a result, we produced  
213 ordered and deduplicated Binary Alignment Map files, containing ordered and deduplicated  
214 data. A schematic overview of the analysis conducted in the current study is shown in Figure  
215 S1.

216

### 217 2.5.3. Variant calling

218

219 Variants were called using FreeBayes version 1.2.0 (<https://github.com/ekg/freebayes>)  
220 (Garrison & Marth, 2012) with a minimum mapping quality of 20, minimum base quality of  
221 20, and minimum coverage of 20 reads at every position in the reference genome. After  
222 variant calling, SNPs were filtered using vcftools version 0.16.15  
223 (<https://vcftools.github.io/index.html>), Bcftools version 1.9  
224 (<https://samtools.github.io/bcftools/>), and in-house AWK shell scripts. Among the  
225 polymorphic loci detected, we selected those with biallelic SNPs with less than 25% of  
226 missing data. Missing genotypes were imputed by Beagle version 5.1 (Browning, Zhou &  
227 Browning, 2018), using a flexible localized haplotype-cluster model to group locally similar  
228 haplotypes into clusters.

229

### 230 2.5.4. Regional heritability mapping (RHM) analysis

231

232 We performed RHM based on the variance component method described in Nagamine et al.  
233 (2012) using REACTA (Regional Heritability Advanced Complex Trait Analysis) version  
234 0.97 (Canela-Xandri et al., 2015). We concatenated the ten chromosomes and split the whole  
235 sugarcane genome into 409 overlapping windows with an average length of 2 Mb to estimate  
236 the proportion of phenotypic variance explained by all genome-wide SNPs or a subset of  
237 SNPs using REML. The following mixed model is considered:

238

$$239 \mathbf{y}^* = \mathbf{1}\mu + \mathbf{Z}\mathbf{g} + \mathbf{Q}\mathbf{r} + \mathbf{e},$$

240

241 where  $\mathbf{y}^*$  is the vector of adjusted phenotypic observations (genotypic values),  $\mathbf{1}$  is a vector of  
242 1s,  $\mu$  is the overall mean,  $\mathbf{Z}$  and  $\mathbf{Q}$  are the design matrices for the whole (without the window)  
243 and the regional random effects, respectively. The distributions and covariance structures of  $\mathbf{g}$   
244 and  $\mathbf{r}$  were  $\mathbf{g} \sim N(\mathbf{0}, \mathbf{G}\sigma_g^2)$  and  $\mathbf{r} \sim N(\mathbf{0}, \mathbf{G}_r\sigma_r^2)$ , respectively. The residual term followed  $\mathbf{e} \sim$   
245  $N(\mathbf{0}, \mathbf{I}\sigma_e^2)$ . We also run a model using all genome-wide SNPs without any window to estimate  
246 the total genomic heritability for each trait ( $h_G^2$ ).

247

248 A Bonferroni correction based on the number of independent windows was used to obtain a  
249 genome-wide significance threshold for the RHM analysis,  $[\alpha_{\text{critical}} = 0.05 / (0.5 \times \text{Num.})$

250 Windows)], as previously proposed (Nagamine et al., 2012) and implemented (Shirali et al.,  
251 2016) in the literature.

252

### 253 2.5.5. Functional analysis of genomic windows

254

255 Among the analyzed genomic regions, we selected the windows explaining above 20% of the  
256 total genomic heritability for TPH and TSH ( $h^2_r/h^2_G \geq 20\%$ ) and above 15% for PC and FB  
257 ( $h^2_r/h^2_G \geq 15\%$ ), where  $h^2_r = \sigma^2_r / (\sigma^2_g + \sigma^2_r + \sigma^2_e)$  and  $h^2_G = \sigma^2_g / (\sigma^2_g + \sigma^2_r + \sigma^2_e)$ . The  
258 gene content of these windows was identified using bedtools version 2.28.0 and the gff3  
259 genome annotation file of the sugarcane cultivar R570 genome. The protein sequences  
260 encoded by the genes included in those windows were functionally characterized through  
261 similarity searches using BLAST version 2.6.0 (Altschul et al., 1990), Blast2GO (Gotz et al.,  
262 2008), and KAAS (KEGG Automatic Annotation Server) (Moriya et al., 2007). The lists of  
263 genes that explained high heritability for each trait were compared through Venn diagrams  
264 using the jvenn package (Bardou et al., 2014). Additionally, the gene ontology (GO) terms of  
265 these genes were further summarized using REViGO (Supek et al., 2011).

266

267

## 268 3. Results

269

### 270 3.1. Phenotypic variation of analyzed traits

271

272 Phenotypic analysis of the sugarcane clones showed a considerable phenotypic variation for  
273 the traits analyzed suggesting that there is genotypic variability to be exploited (Figure 1;  
274 Tables S1 and S2). The genotypic values obtained with the adjusted model, described above,  
275 ranged from 8.39 to 16.43 (average of 11.09) for a percentage of FB, from 6.50 to 17.00 (av.  
276 13.81) for PC, from 6.81 to 20.66 (av. 14.83) for TPH, and from 51.52 to 152.23 (av. 107.96)  
277 for TSH (Table S1). Genotypic variance ( $\sigma^2_u$ ) and broad-sense heritability ( $H^2$ ) were 2.21 and  
278 0.56 for FB; 2.02 and 0.71 for PC; 7.48 and 0.58 for TPH; 389.98 and 0.57 for TSH,  
279 respectively (Table S2).

280

281 Pearson's pairwise correlations between adjusted genetic values of FB, PC, TPH, and TSH  
282 are shown in Figure 1 and evaluated for their significance (P-value  $\leq 0.01$ ). We observed FB  
283 and PC were negatively correlated (-0.18). TPH was positively correlated with PC (0.46) and  
284 highly correlated with TSH (0.86). FB was not significantly correlated with TSH and TPH.  
285 We observed a weak and negligible correlation between TSH and PC.

286

### 287 3.2. Genotyping analysis and variant selection

288

289 Among all 4.77 billion reads sequenced from the 508 sugarcane clones, 4.58 billion (96.01%)  
290 were trimmed and selected for being mapped on the reference genome (~ 9.02 million of  
291 reads per sugarcane clone). These reads were mapped with an average rate of 75.73%  
292 (ranging from 71.39 to 77.94% among the sugarcane clones) and genome coverage of 1.46X  
293 (ranging from 1.14 to 1.88 among the sugarcane chromosomes) (Table 1).

294

295 From those reads, 15.41 million polymorphic loci were identified among the sugarcane  
296 clones, and 814,987 SNPs were subsequently filtered by selecting biallelic loci with less than  
297 25% of missing data. After SNP imputation and quality control, 375,195 SNPs were selected  
298 for the RHM analysis, which corresponds to a frequency of 917.48 SNPs/Mb in the sugarcane

299 genome (Table 1). Among sugarcane chromosomes (Sh), Sh05 was the least polymorphic  
300 (772.81 SNPs/Mb), and Sh04 was the most polymorphic (1,025.88 SNPs/Mb).

301

### 302 3.3. Regional heritability mapping analysis

303

304 The calculated total genomic heritability ( $h^2_G$ ) was  $0.798 \pm 0.233$  for FB,  $0.932 \pm 0.133$  for PC,  
305  $0.369 \pm 0.256$  for TPH, and  $0.383 \pm 0.210$  for TSH. A suggestive significance threshold of  
306 3.61 for  $-\log_{10}$  P-value (i.e., P-value = 0.000244) was calculated for window selection in the  
307 RHM analysis. None of the analyzed windows were associated with the traits with P-values  
308 above this threshold (Figure S2). Therefore, the selection of windows was proceeded based on  
309 window heritability ( $h^2_r$ ), and the proportion of  $h^2_G$  explained ( $h^2_r/h^2_G$ ) aiming to identify  
310 regions that could be further exploited for prospecting genes (Figure 2).

311

312 Among the analyzed windows, we selected those that explained 15% of  $h^2_G$  for FB (17  
313 windows - 1,615 genes) and PC (16 windows - 1,517 genes), and those that explained 20% of  
314  $h^2_G$  for TPH (64 windows - 5,654 genes) and TSH (72 windows - 6,050 genes) (Figures 2 and  
315 3; Table S3). Even though distributed across all the chromosomes, none of these selected  
316 windows was related to all traits jointly. One window was related to FB, PC, and TPH (w146  
317 - Sh03: 31,787,519 to 34,081,415 - 137 genes), and two windows were related to PC, TPH,  
318 and TSH (w90 - Sh02: 25,073,847 to 27,836,987 - 153 genes; w393 - Sh10: 19,693,048 to  
319 22,127,732 - 85 genes). TPH and TSH were the traits that shared the highest number of  
320 windows (32 windows - 3,043 genes).

321

322 The top five windows with high heritability explained 20.8 to 24.6% of  $h^2_G$  for FB (629  
323 genes), 18.0 to 22.0% for PC (452 genes), 53.8 to 66.0% for TPH (705 genes), and 59.5 to  
324 67.4% for TSH (413) (Figure 3). Among these windows, w297 (Sh07: 14688970 to 17462449  
325 - 121 genes) was the only one related to two traits, and it explained 63.5% of the total  
326 heritability for TPH and 66.1% for TSH.

327

328 Functional annotations of all the 2,078 genes included in those top five windows generated a  
329 non-redundant list of the biological process containing 68 GOs for FB, PC and TPH, and 48  
330 GOs for TSH (Figure 4). Also, 712 genes (34.26%) were classified into 244 KEGG ortholog  
331 groups, which were mapped to 104 KEGG pathways, including carbon metabolism, starch,  
332 and sucrose metabolism, and phenylpropanoid biosynthesis pathways (Table 2).

333

334

## 335 4. Discussion

336

337 Genotyping by sequencing (GBS) coupled with capture-seq methods have been a practical  
338 approach to survey polymorphisms in the genomes of *Saccharum* species. It reduces the  
339 complexity of genomes and allows genome-wide analysis aiming to develop molecular  
340 markers (Song et al., 2016; Balsalobre et al., 2017; Yang et al., 2017, 2018, 2019; Fickett et  
341 al., 2019). However, the complexity of the sugarcane genome still poses some challenges for  
342 the widespread use of GBS and the adoption of molecular marker-assisted selection in  
343 breeding programs. The high and variable ploidy of the allopolyploid genome  
344 (Thiruganasambandam, Hoang & Henry, 2018) makes the identification of SNPs  
345 significantly associated with agronomic traits of interest in sugarcane crop a challenging task.  
346 The identification of significant SNPs would demand a high coverage when using the GBS  
347 approach, which increases the costs involved in population studies (Meirmans, Liu & Van  
348 Tienderen, 2018; Yang et al., 2018). Studies reporting SNPs associated with agronomic traits

349 in the sugarcane genome are still scarce. For instance, only 229 SNPs (that explained > 5%  
350 phenotypic variation at the unadjusted P-value cutoff of 0.05) have been reported for 97  
351 clones in a breeding population (Fickett et al., 2019) and 191 SNPs (Bonferroni corrected P-  
352 value cutoff of 0.05) for 308 accessions in a germplasm collection (Yang et al., 2018).

353

354 Based on the low number of SNPs detected at 5% of significance threshold in previous work,  
355 and also because we used a low coverage capture-seq data from our breeding population  
356 (containing 508 sugarcane genotypes), we performed RHM analysis to investigate regions in  
357 the sugarcane genome related to agronomic traits. These sugarcane clones showed  
358 comparable phenotypic data, as observed in other studies (Racedo et al., 2016; Yang et al.,  
359 2018; Fickett et al., 2019). Their average values of FB, PC, TPH, and TSH were 11.09, 13.81,  
360 14.83, and 107.96, respectively. Comparable TPH of 17.12 t/ha was observed in Reunion  
361 Island (Gouy et al., 2014), 9.22 t/ha in Tucumán (Argentina) (Racedo et al., 2016), and 8.84  
362 t/ha in Louisiana (United States) (Fickett et al., 2019).

363

364 The high and positive pairwise correlation observed for TPH with TSH and PC is expected  
365 because TPH is estimated as a product of these two variables. On the other hand, the negative  
366 pairwise correlation between FB and PC is in agreement with the knowledge about carbon  
367 partition and metabolism in sugarcane (Hoang et al., 2017). The estimates of broad-sense  
368 heritability ranged from 0.56 to 0.71, similar to the range observed for the same traits in other  
369 studies with sugarcane (Gouy et al., 2014; Racedo et al., 2016; Fickett et al., 2019).

370

371 The RHM analysis appears to be an interesting approach to screening the sugarcane genome  
372 aiming to identify regions related to the agronomic traits. We argued that the regions  
373 explaining a higher portion of the genomic heritability could be further explored for  
374 molecular marker investigation. Unfortunately, in the present study, none of the analyzed  
375 genome windows were significantly associated with the traits considered at the suggestive  
376 significance threshold of 3.94 (Figure S2), which could be due to the lower sequencing  
377 coverage, heterogeneity of regions covered by the sequencing, and the polyploidy effect. To  
378 overcome these limitations, we considered a new strategy to infer about the regions of the  
379 genome related to the traits under study: the selection of windows showing high heritability  
380 ( $h^2_g$ ) and proceeded with the analysis of their genic content to identify candidate regions to  
381 develop molecular markers. The analyzed traits showed regions with higher heritability,  
382 explaining 15% or 20% of  $h^2_G$  in almost all sugarcane chromosomes. The number of windows  
383 above these thresholds was lower for FB (17 windows > 15%; 1,615 genes) and PC (16  
384 windows > 15%; 1,517 genes) when compared to TPH (65 windows > 20%; 5,654 genes) and  
385 TSH (73 windows > 20%; 6,050 genes) (Figures 2 and 3). These differences could be due to  
386 the lower complexity of FB and PC, which might be controlled by a smaller number of genes.  
387 The selection of top-5 windows with higher heritability was enough to reduce the complexity  
388 of the sugarcane genome and to provide insights about regions containing a set of genes  
389 possibly related to FB (629 genes), PC (452 genes), TPH (705 genes) and TSH (413 genes)  
390 traits.

391

392 Analysis of biological processes attributed to a function of genes located in the windows with  
393 higher heritability for FB (629 genes) indicated GO terms such as “cell wall organization”  
394 (GO: 0071555), “flavonoid biosynthetic process” (GO: 0009813), and “lignin catabolic  
395 process” (GO: 0046274) (Figure 4). Some of these genes encode enzymes that catalyze the  
396 biosynthesis of secondary metabolites such as flavonoids, phenylpropanoids, and lignin.  
397 Among these enzymes are shikimate O-hydroxycinnamoyltransferase (window w268; gene  
398 Sh06\_g013010), scopoletin glucosyltransferase (w359/w360; Sh09\_g011980), and flavonoid



399 3'-monooxygenase (w360; Sh09\_g012740). Genes related to “carbohydrate metabolic  
400 process” (GO:0005975), “carbon utilization” (GO:0015976), and “sucrose metabolic process”  
401 (GO:0005985) are also included in genomic regions with higher heritability for FB. These  
402 genes encode enzymes such as hexokinase (w268; Sh06\_g013660) and malate dehydrogenase  
403 (w353; Sh09\_g008010).

404

405 Genes related to “carbohydrate metabolic process” (GO:0005975) and “photosynthesis”  
406 (GO:0015979) are among those included in the windows with higher heritability for PC (452  
407 genes). These genes encode enzymes of glycolysis/gluconeogenesis, pentose phosphate,  
408 oxidative phosphorylation pathways, such as fructose-bisphosphate aldolase (w317;  
409 Sh08\_g004080), glucose-6-phosphate 1-epimerase (2 copies in w268), phosphoglycerate  
410 mutase (w203; Sh04\_g016390), succinyl-CoA synthetase (2 copies in w202), V-type proton  
411 ATPase subunit E (w144; Sh03\_g016860) and vacuolar ATP synthase 16kDa proteolipid  
412 subunit (w317; Sh08\_g003930). Genes involved in phenylpropanoid biosynthesis pathways,  
413 such as phenylalanine ammonia-lyase (PAL) (3 copies in w202), and phenylalanine/tyrosine  
414 ammonia-lyase (PTAL) (w202; Sh04\_g015380) are also included in these windows.

415

416 Windows with higher heritability for TPH (705 genes) contain genes which are related to  
417 “carbohydrate metabolic process”, “sucrose metabolic process” (GO:0005985), “cell wall  
418 organization” (GO:0071555) and “cell redox homeostasis” (GO:0045454). Pyruvate kinase  
419 (w020; Sh01\_g011250), aconitate hydratase (w063; Sh01\_g042590), vacuolar ATPase B  
420 subunit (w394/w395; Sh10\_g012040) and beta-amylase (w063; Sh01\_g042110) are among  
421 the enzymes encoded by these genes, which are part of the carbon, starch, and sucrose  
422 metabolism pathways. Also, two genes that encode the enzymes 4-coumarate-CoA ligase  
423 (w063; Sh01\_g041030) and coniferyl-aldehyde dehydrogenase (w395; Sh10\_g012300),  
424 which are part of phenylpropanoid biosynthesis pathways, are also included in these high  
425 heritability windows.

426

427 Among the genes located in windows with higher heritability for TSH (413 genes), some are  
428 related to “carbohydrate metabolic process” (GO:0005975), “cell wall organization”  
429 (GO:0071555), “sucrose metabolic process” (GO:0005985), “photorespiration”  
430 (GO:0009853), and “ethylene-activated signaling pathway” (GO:0009873). The genes encode  
431 the enzymes ribulose-1,5-bisphosphate carboxylase/oxygenase large subunit (w036;  
432 Sh01\_g020380), alanine transaminase (w036; Sh01\_g020340), trehalose 6-phosphate  
433 phosphatase (w212; Sh04\_g021630), alcohol dehydrogenase (w036; Sh01\_g020520), aldose  
434 1-epimerase (w036; Sh01\_g020600), and ethylene receptor (EIN4) (w244; Sh06\_g001310).  
435 In contrast to the other traits, none of the windows selected for TSH contain genes related to  
436 phenylpropanoid pathways.

437

438 Taken together, 14 windows among those top-higher heritabilities for each trait analyzed  
439 contain 35 genes that encode enzymes that catalyze biochemical reactions of carbon  
440 metabolism, starch and sucrose metabolism, and phenylpropanoid biosynthesis pathways  
441 (Table 2). Carbon partitioning is a critical process by which plants distribute the energy of  
442 photosynthesis and convert the assimilated carbon into sugar or its derivatives (Wang et al.,  
443 2013). Most plants store carbon as starch or cellulose (insoluble) with a lower concentration  
444 of sucrose (soluble), while sugarcane can store high concentrations of sucrose on its stems  
445 (Wang et al., 2013). Sucrose is cleaved into fructose and UDP-Glu, which is a nucleotide  
446 sugar precursor for most cell wall polysaccharides (Verbančič et al., 2018). Sugarcane  
447 maintains a dynamic balance of degradation of sucrose for respiration or its re-synthesis for  
448 storage. During this cycle, the carbon can be partitioned into other metabolites or fixed in

449 polymers that can either be remobilized (such as starch in plastids) or added to structural  
450 biomass (such as cellulose, hemicelluloses, and lignin) (Wang et al., 2013). In this balance,  
451 the enzymes sucrose synthase (SuSy), sucrose phosphate synthase (SPS), sucrose phosphate  
452 phosphatase (SPP), and invertase play a central role in sucrose metabolism. At the same time,  
453 cellulose synthesis is catalyzed by enzyme complexes of cellulose synthase (CesA) (Stein &  
454 Granot, 2019). Cell wall biosynthesis can reduce sucrose accumulation since carbon fluxes  
455 directed to plant growth, and cell wall expansion may alter carbon partitioning into sucrose  
456 (Papini-Terzi et al., 2009). It is also possible that sucrose accumulation may trigger increased  
457 lignification (Papini-Terzi et al., 2009).

458  
459 The STP assembly of the sugarcane genome has multiple copies of SuSy (11 copies), SPS (6  
460 copies), SPP (2 copies), invertase (10 copies), and CesA (37 copies) annotated on its  
461 sequence. None of them is located in the top windows with higher heritability for the analyzed  
462 traits. However, window w194 (which explains 15% of  $h^2_G$  for FB and 32.2% for TSH)  
463 contains a gene that encodes a copy of invertase (Sh04\_g011120). Among the enzymes  
464 encoded by genes located in the top windows with higher heritability, phenylalanine  
465 ammonia-lyase (PAL) (Sh04\_g015390, Sh04\_g015400, and Sh04\_g015410; w202 which  
466 explains 18% for PC) stands out as a critical enzyme involved in the phenylpropanoid  
467 pathway and biosynthesis of lignin (Zhang & Liu, 2015), which is also related to sucrose  
468 content (Papini-Terzi et al., 2009).

469  
470

## 471 5. Conclusions

472

473 Throughout the analyses performed here, RHM has shown to be a useful approach to identify  
474 regions in the sugarcane genome related to agronomic traits. Even with the complexity of the  
475 sugarcane genome and its polyploidy impacting the identification of regions containing SNPs  
476 significantly associated with the phenotypes analyzed, the selection of windows that  
477 explained higher proportions of genomic heritability allows us to identify genomic regions  
478 containing a set of genes that are related to them. Among the selected windows, we identified  
479 a set of genes that encode enzymes that integrate metabolic pathways directly related to the  
480 traits analyzed. The selection of windows with higher heritability, therefore, represents an  
481 alternative for sugarcane breeders to reduce the complexity of the sugarcane genome since the  
482 selected windows span a region of 58.38Mb, which corresponds to 14,28% of the STP  
483 assembly of sugarcane genome. These windows correspond to promising genomic regions for  
484 the development of gene panels aiming the practice of marker-assisted selection of traits such  
485 as percentage of fiber in sugarcane bagasse (FB), apparent percentage of sucrose in sugarcane  
486 (PC), tonnes of pol per hectare (TPH) and tonnes of stalks per hectare (TSH). The findings  
487 obtained in this study will contribute to the progress of the genetic improvement of sugarcane.

488

489

## 490 6. Declarations

491

492 **Acknowledgments:** The authors would like to thank the Núcleo de Análise de Biomoléculas  
493 (NuBioMol) and Sugarcane Breeding Program, Universidade Federal de Viçosa, MG, Brazil  
494 for providing the facilities necessary for the execution of the experiments.

495

496 **Funding:** This work was funded by Coordenação de Aperfeiçoamento de Pessoal de Nível  
497 Superior (CAPES) - Finance Code 001, Conselho Nacional de Desenvolvimento Científico e

498 Tecnológico (CNPq), Fundação de Amparo à Pesquisa do Estado de Minas Gerais  
499 (FAPEMIG).

500

501 **Author's contributions:** PMPV, MM, GM, and LAP analyzed data and wrote the  
502 manuscript; MHPB and LAP planned and designed the research. PMAC conducted the  
503 experiments. MHPB and LAP coordinated the research. All authors reviewed and approved  
504 the manuscript.

505

506 **Conflicts of interest/Competing interests:** The authors declare that they have no conflict of  
507 interest.

508

509

## 510 7. References

511

512 Aitken KSK, McNeil MD, Berkman PJ, Hermann S, Kilian A, Bundock PCP, Li JJ. 2014.  
513 Comparative mapping in the Poaceae family reveals translocations in the complex  
514 polyploid genome of sugarcane. *BMC Plant Biology* 14:190. DOI: 10.1186/s12870-014-  
515 0190-x.

516 Altschul SF, Gish W, Miller W, Myers EW, Lipman DJ. 1990. Basic local alignment search  
517 tool. *Journal of Molecular Biology* 215:403–410. DOI: 10.1016/S0022-2836(05)80360-  
518 2.

519 Baffa DCF, de A. Costa PM, da Silveira G, Lopes FJF, Barbosa MHP, Loureiro ME, Cruz  
520 CD, Peternelli LA. 2014. Path Analysis for Selection of Saccharification-Efficient  
521 Sugarcane Genotypes through Agronomic Traits. *Agronomy Journal* 106:1643–1650.  
522 DOI: 10.2134/agronj13.0576.

523 Balsalobre TWA, da Silva Pereira G, Margarido GRA, Gazaffi R, Barreto FZ, Anoni CO,  
524 Cardoso-Silva CB, Costa EA, Mancini MC, Hoffmann HP, de Souza AP, Garcia AAF,  
525 Carneiro MS. 2017. GBS-based single dosage markers for linkage and QTL mapping  
526 allow gene mining for yield-related traits in sugarcane. *BMC Genomics* 18:72. DOI:  
527 10.1186/s12864-016-3383-x.

528 Barbosa MHP, Resende MDV, Dias LA dos S, Barbosa GV de S, de Oliveira RA, Peternelli  
529 LA, Daros E. 2012. Genetic improvement of sugar cane for bioenergy: the brazilian  
530 experience in network research with RIDESA. *Crop Breeding and Applied  
531 Biotechnology* 12:87–98. DOI: 10.1590/S1984-70332012000500010.

532 Barbosa MHP, de Silveira LCI, de Oliveira MW, de Souza V de FM, Ribeiro SNN. 2001.  
533 RB867515 Sugarcane cultivar. *Crop Breeding and Applied Biotechnology* 1:437–438.  
534 DOI: 10.13082/1984-7033.v01n04a10.

535 Bardou P, Mariette J, Escudié F, Djemiel C, Klopp C. 2014. Jvenn: An interactive Venn  
536 diagram viewer. *BMC Bioinformatics* 15:293. DOI: 10.1186/1471-2105-15-293.

537 Bolger AM, Lohse M, Usadel B. 2014. Trimmomatic: a flexible trimmer for Illumina  
538 sequence data. *Bioinformatics (Oxford, England)* 30:2114–2120.

539 Browning BL, Zhou Y, Browning SR. 2018. A One-Penny Imputed Genome from Next-  
540 Generation Reference Panels. *American Journal of Human Genetics* 103:338–348. DOI:  
541 10.1016/j.ajhg.2018.07.015.

542 Canela-Xandri O, Law A, Gray A, Woolliams JA, Tenesa A. 2015. A new tool called  
543 DISSECT for analysing large genomic data sets using a Big Data approach. *Nature  
544 Communications* 6:10162. DOI: 10.1038/ncomms10162.

545 Castro RD, Peternelli LA, Resende MDV, Marinho CD, Costa PMA, Barbosa MHP, Moreira  
546 EFA. 2016. Selection between and within full-sib sugarcane families using the modified  
547 BLUPIS method (BLUPISM). *Genetics and Molecular Research* 15:gmr.15017334.

- 548 DOI: 10.4238/gmr.15017334.
- 549 D'Hont A, Glaszmann JC, Hogarth DM, Int Soc Sugar Cane T. 2001. Sugarcane genome  
550 analysis with molecular markers: a first decade of research. In: Hogarth DM ed.  
551 *Proceedings of the International Society of Sugar Cane Technologists*. Brisbane,  
552 Australia.: Australian Soc Sugar Cane Technologists, 556–559.
- 553 Federer WT, Raghavarao D. 1975. On Augmented Designs. *Biometrics* 31:29–35. DOI:  
554 10.2307/2529707.
- 555 Fickett N, Gutierrez A, Verma M, Pontif M, Hale A, Kimbeng C, Baisakh N. 2019. Genome-  
556 wide association mapping identifies markers associated with cane yield components and  
557 sucrose traits in the Louisiana sugarcane core collection. *Genomics*. DOI:  
558 10.1016/j.ygeno.2018.12.002.
- 559 Figueira TR e S, Okura V, Rodrigues da Silva F, Jose da Silva M, Kudrna D, Ammiraju JSS,  
560 Talag J, Wing R, Arruda P. 2012. A BAC library of the SP80-3280 sugarcane variety  
561 (*saccharum* sp.) and its inferred microsynteny with the sorghum genome. *BMC research*  
562 *notes* 5:185. DOI: 10.1186/1756-0500-5-185.
- 563 Garrison E, Marth G. 2012. Haplotype-based variant detection from short-read sequencing.  
564 *arXiv:arXiv:1207.3907*.
- 565 Garsmeur O, Droc G, Antonise R, Grimwood J, Potier B, Aitken K, Jenkins J, Martin G,  
566 Charron C, Hervouet C, Costet L, Yahiaoui N, Healey A, Sims D, Cherukuri Y,  
567 Sreedasyam A, Kilian A, Chan A, Van Sluys MA, Swaminathan K, Town C, Bergès H,  
568 Simmons B, Glaszmann JC, Van Der Vossen E, Henry R, Schmutz J, D'Hont A. 2018. A  
569 mosaic monoploid reference sequence for the highly complex genome of sugarcane.  
570 *Nature Communications* 9:2638. DOI: 10.1038/s41467-018-05051-5.
- 571 Gotz S, Garcia-Gomez JM, Terol J, Williams TD, Nagaraj SH, Nueda MJ, Robles M, Talon  
572 M, Dopazo J, Conesa A. 2008. High-throughput functional annotation and data mining  
573 with the Blast2GO suite. *Nucleic Acids Research* 36:3420–3435. DOI:  
574 10.1093/nar/gkn176.
- 575 Gouy M, Rousselle Y, Thong Chane A, Anglade A, Royaert S, Nibouche S, Costet L. 2014.  
576 Genome wide association mapping of agro-morphological and disease resistance traits in  
577 sugarcane. *Euphytica* 202:269–284. DOI: 10.1007/s10681-014-1294-y.
- 578 Hoang N V., Furtado A, Donnan L, Keefe EC, Botha FC, Henry RJ. 2017. High-Throughput  
579 Profiling of the Fiber and Sugar Composition of Sugarcane Biomass. *Bioenergy*  
580 *Research* 10:400–416. DOI: 10.1007/s12155-016-9801-8.
- 581 Legendre BL. 1992. The core/press method for predicting the sugar yield from cane for use in  
582 cane payment. *Sugar Journal* 54:2–7.
- 583 Li H, Durbin R. 2009. Fast and accurate short read alignment with Burrows-Wheeler  
584 transform. *Bioinformatics* 25:1754–1760. DOI: 10.1093/bioinformatics/btp324.
- 585 Lu YH, D'Hont A, Paulet F, Grivet L, Arnaud M, Glaszmann JC. 1994. Molecular diversity  
586 and genome structure in modern sugarcane varieties. *Euphytica* 78:217–226. DOI:  
587 10.1007/BF00027520.
- 588 Meirmans PG, Liu S, Van Tienderen PH. 2018. The Analysis of Polyploid Genetic Data.  
589 *Journal of Heredity* 109:283–296. DOI: 10.1093/jhered/esy006.
- 590 Moriya Y, Itoh M, Okuda S, Yoshizawa AC, Kanehisa M. 2007. KAAS: An automatic  
591 genome annotation and pathway reconstruction server. *Nucleic Acids Research*  
592 35:W182-5. DOI: 10.1093/nar/gkm321.
- 593 Nagamine Y, Pong-Wong R, Navarro P, Vitart V, Hayward C, Rudan I, Campbell H, Wilson  
594 J, Wild S, Hicks AA, Pramstaller PP, Hastie N, Wright AF, Haley CS. 2012. Localising  
595 Loci underlying Complex Trait Variation Using Regional Genomic Relationship  
596 Mapping. *PLoS ONE* 7:e46501. DOI: 10.1371/journal.pone.0046501.
- 597 Neves LG, Davis JM, Barbazuk WB, Kirst M. 2013. Whole-exome targeted sequencing of the

- 598 uncharacterized pine genome. *The Plant Journal* 75:146–156. DOI: 10.1111/tpj.12193.
- 599 Nishiyama MY, Ferreira SS, Tang P-Z, Becker S, Pörtner-Taliana A, Souza GM, Souza GM.
- 600 2014. Full-length enriched cDNA libraries and ORFeome analysis of sugarcane hybrid
- 601 and ancestor genotypes. *PLoS one* 9:e107351. DOI: 10.1371/journal.pone.0107351.
- 602 Papini-Terzi FS, Rocha FR, Vêncio RZN, Felix JM, Branco DS, Waclawovsky AJ, Del Bem
- 603 LEV, Lembke CG, Costa MDL, Nishiyama MY, Vicentini R, Vincentz MGA, Ulian EC,
- 604 Menossi M, Souza GM. 2009. Sugarcane genes associated with sucrose content. *BMC*
- 605 *Genomics*. DOI: 10.1186/1471-2164-10-120.
- 606 Peternelli LA, Bernardes DP, Brasileiro BP, Barbosa MHP, Silva RHT. 2018. Decision Trees
- 607 as a Tool to Select Sugarcane Families. *American Journal of Plant Sciences*. DOI:
- 608 10.4236/ajps.2018.92018.
- 609 Piperidis G, Piperidis N, D’Hont A. 2010. Molecular cytogenetic investigation of
- 610 chromosome composition and transmission in sugarcane. *Molecular Genetics and*
- 611 *Genomics* 284:65–73. DOI: 10.1007/s00438-010-0546-3.
- 612 Raboin LM, Pauquet J, Butterfield M, D’Hont A, Glaszmann JC. 2008. Analysis of genome-
- 613 wide linkage disequilibrium in the highly polyploid sugarcane. *Theoretical and Applied*
- 614 *Genetics* 116. DOI: 10.1007/s00122-007-0703-1.
- 615 Racedo J, Gutiérrez L, Perera MF, Ostengo S, Pardo EM, Cuenya MI, Welin B, Castagnaro
- 616 AP. 2016. Genome-wide association mapping of quantitative traits in a breeding
- 617 population of sugarcane. *BMC Plant Biology* 16:142. DOI: 10.1186/s12870-016-0829-x.
- 618 Resende MDV de. 2016. Software Selegen-REML/BLUP: a useful tool for plant breeding.
- 619 *Crop Breeding and Applied Biotechnology* 16:330–339. DOI: 10.1590/1984-
- 620 70332016v16n4a49.
- 621 Resende RT, de Resende MD V., Azevedo CF, Silva FF e., Melo LC, Pereira HS, Souza
- 622 TLPO, Valdisser PAMR, Brondani C, Vianello RP. 2018. Genome-wide association and
- 623 Regional Heritability Mapping of plant architecture, lodging and productivity in
- 624 phaseolus vulgaris. *G3: Genes, Genomes, Genetics* 8:2841–2854. DOI:
- 625 10.1534/g3.118.200493.
- 626 Schneider F. 1979. *Sugar Analysis: Official and Tentative Methods Recommended by the*
- 627 *International Commission for Uniform Methods of Sugar Analysis (ICUMSA)*. Hyperion
- 628 Books.
- 629 Shirali M, Pong-Wong R, Navarro P, Knott S, Hayward C, Vitart V, Rudan I, Campbell H,
- 630 Hastie ND, Wright AF, Haley CS. 2016. Regional heritability mapping method helps
- 631 explain missing heritability of blood lipid traits in isolated populations. *Heredity*
- 632 116:333–338. DOI: 10.1038/hdy.2015.107.
- 633 Song J, Yang X, Resende MFR, Neves LG, Todd J, Zhang J, Comstock JC, Wang J. 2016.
- 634 Natural allelic variations in highly polyploidy *Saccharum* complex. *Frontiers in Plant*
- 635 *Science* 7:804. DOI: 10.3389/fpls.2016.00804.
- 636 Stein O, Granot D. 2019. An overview of sucrose synthases in plants. *Frontiers in Plant*
- 637 *Science* 10:95. DOI: 10.3389/fpls.2019.00095.
- 638 Supek F, Bošnjak M, Škunca N, Šmuc T. 2011. Revigo summarizes and visualizes long lists
- 639 of gene ontology terms. *PLoS ONE* 6:e21800. DOI: 10.1371/journal.pone.0021800.
- 640 Tanimoto T. 1964. The press method of cane analysis. *Hawaiian Planters’ Record* 57:133–
- 641 150.
- 642 Thirugnanasambandam PP, Hoang N V., Henry RJ. 2018. The Challenge of Analyzing the
- 643 Sugarcane Genome. *Frontiers in Plant Science*. DOI: 10.3389/fpls.2018.00616.
- 644 Verbančič J, Lunn JE, Stitt M, Persson S. 2018. Carbon Supply and the Regulation of Cell
- 645 Wall Synthesis. *Molecular Plant* 11:75–94. DOI: 10.1016/j.molp.2017.10.004.
- 646 Wang J, Nayak S, Koch K, Ming R. 2013. Carbon partitioning in sugarcane (*Saccharum*
- 647 species). *Frontiers in Plant Science* 4:201. DOI: 10.3389/fpls.2013.00201.

- 648 Yang X, Luo Z, Todd J, Sood S, Wang J. 2018. Genome-wide association study of multiple  
649 yield components in a diversity panel of polyploid sugarcane (*Saccharum*  
650 spp.). *bioRxiv*:387001. DOI: 10.1101/387001.
- 651 Yang X, Song J, You Q, Paudel DR, Zhang J, Wang J. 2017. Mining sequence variations in  
652 representative polyploid sugarcane germplasm accessions. *BMC Genomics* 18:594. DOI:  
653 10.1186/s12864-017-3980-3.
- 654 Yang X, Sood S, Luo Z, Todd J, Wang J. 2019. Genome-wide association studies identified  
655 resistance loci to orange rust and yellow leaf virus diseases in sugarcane (*Saccharum*  
656 spp.). *Phytopathology* 109:623–631. DOI: 10.1094/PHYTO-08-18-0282-R.
- 657 Zhang X, Liu CJ. 2015. Multifaceted regulations of gateway enzyme phenylalanine ammonia-  
658 lyase in the biosynthesis of phenylpropanoids. *Molecular Plant* 8:17–27. DOI:  
659 10.1016/j.molp.2014.11.001.

660  
661

## 662 Figures

663

664 **Figure 1. Overview of genotypic values (overall mean + BLUP) of traits evaluated in the**  
665 **sugarcane breeding population.** Five hundred eight sugarcane clones were evaluated for  
666 percentage of fiber in sugarcane bagasse (FB), apparent percentage of sucrose in sugarcane  
667 (PC), tonnes of pol per hectare (TPH), and tonnes of stalks per hectare (TSH).  $\sigma_u^2$ : genotypic  
668 variance.  $H^2$ : broad-sense heritability. \*\*\*: P-value < 0.01.

669

670 **Figure 2. Regional heritability mapping (RHM) analysis of the sugarcane genome.** The  
671 tilemap of RHM distribution along the genome of 508 sugarcane clones highlights the  
672 genomic regions with higher heritability for the percentage of fiber in sugarcane bagasse  
673 (FB), apparent percentage of sucrose in sugarcane (PC), tonnes of pol per hectare (TPH), and  
674 tonnes of stalks per hectare (TSH). The ten chromosomes sugarcane genome (Sh01 to Sh10)  
675 were concatenated and split into windows with 2 Mb length. The color scale on the top-right  
676 side of the plot shows the magnitude of  $h^2_r$  for each window.

677

678 **Figure 3. Gene content of sugarcane genomic regions with higher heritability for FB,**  
679 **PC, TSH, and TPH traits in regional heritability mapping analysis.** A) Gene counting of  
680 all regions with higher heritabilities. All genes are listed in Table S3. B) Gene counting of  
681 top-5 windows with higher heritability. All genes are listed in Table S4. C) Detailed  
682 information about the top-5 windows. Window 297 is the only one shared by two traits and is  
683 marked in bold and underlined. Window 310 spans two chromosomes, comprising a region of  
684 2 Mb, which begins in the last window of Sh07 and ends in the first window Sh08, and is  
685 marked with an asterisk.

686

687 **Figure 4. Functional analysis of the genes identified in of top-5 windows of sugarcane**  
688 **genome with higher heritability for FB, PC, TSH, and TPH traits in regional heritability**  
689 **mapping analysis.**

690

691

## 692 Tables

693

694 **Table 1. Summary of genotyping of analyzed sugarcane genotypes.** Capture sequencing  
695 data of 508 sugarcane genotypes were mapped to the reference genome, and variant calling  
696 analysis was performed with the SNP quality control process.

697

698 **Table 2. Genes located at the top-5 windows with higher heritability and that are related**  
699 **to carbon metabolism, starch, and sucrose metabolism, and phenylpropanoid**  
700 **biosynthesis pathways.** Genes that were assigned to the KEGG ortholog groups (KOs) and  
701 mapped to the KEGG pathways of carbon metabolism (CM), glycolysis and gluconeogenesis  
702 (GG), sucrose, and starch metabolism (SSM), phenylpropanoid biosynthesis (PB), and  
703 oxidative phosphorylation (OP).

704

705

706 **Supplementary Materials**

707

708 **Supplementary Material 1. Tables:**

709

710 **Table S1. Adjusted phenotypic observations (genotypic values) of evaluated sugarcane**  
711 **clones.** This population consisted of 508 clones from 100 half-sib families, originated from  
712 crossings between elite sugarcane clones and commercial cultivars. Sugarcane clones were  
713 evaluated for the percentage of fiber in sugarcane bagasse (FB), apparent percentage of  
714 sucrose in sugarcane (PC), tonnes of pol per hectare (TPH), and tonnes of stalks per hectare  
715 (TSH).

716

717 **Table S2. Estimates of variance components and genetic parameters for percentage of**  
718 **fiber in sugarcane bagasse (FB), apparent percentage of sucrose in sugarcane (PC),**  
719 **tonnes of pol per hectare (TPH), and tonnes of stalks per hectare (TSH).**  $\sigma^2_u$ : genotypic  
720 variance.  $\sigma^2_b$ : variance between blocks.  $\sigma^2_e$ : residual variance.  $\sigma^2_f$ : individual phenotypic  
721 variance.  $H^2$ : broad-sense heritability.

722

723 **Table S3. Windows with higher heritability in the sugarcane genome for analyzed traits.**  
724  $h^2_w$ : window heritability.  $h^2_G$ : genomic heritability of the analyzed trait.  $h^2_r/h^2_G$ : the  
725 proportion of genomic heritability explained by a window. Analyzed traits: percentage of  
726 fiber in sugarcane bagasse (FB), apparent percentage of sucrose in sugarcane (PC), tonnes of  
727 stalks per hectare (TSH), and tonnes of pol per hectare (TPH).

728

729 **Table S4. Functional annotation of genes included in top-5 windows with higher**  
730 **heritability in sugarcane genome for percentage of fiber in sugarcane bagasse (FB),**  
731 **apparent percentage of sucrose in sugarcane (PC), tonnes of pol per hectare (TPH) and**  
732 **tonnes of stalks per hectare (TSH).**

733

734 **Table S5. Gene Ontology (GO) terms lists summarized by REVIGO.** Non-redundant lists  
735 of GO terms assigned to the genes included in top-5 windows with higher heritability for  
736 percentage of fiber in sugarcane bagasse (FB), apparent percentage of sucrose in sugarcane  
737 (PC), tonnes of pol per hectare (TPH) and tonnes of stalks per hectare (TSH).

738

739

740 **Supplementary Material 2. Figures:**

741

742 **Figure S1. Schematic overview of the genotyping of sugarcane clones performed in this**  
743 **study.** The raw reads were processed, mapped to the sugarcane reference genome, and a  
744 variant calling for SNPs was performed. The software that was used for each step and their  
745 respective versions are indicated on the boxes. The command-lines used and the parameters  
746 which were considered are also shown.

747

748 **Figure S2. Significance analysis of RHM window-trait associations along the genome of**  
749 **analyzed sugarcane clones. (A).** Circular Manhattan plots ( $-\log_{10} P$ ) of RHM window-trait  
750 association for the percentage of fiber in sugarcane bagasse (FB), apparent percentage of  
751 sucrose in sugarcane (PC), tonnes of pol per hectare (TPH), and tonnes of stalks per hectare  
752 (TSH). **(B).** Quantile-quantile (QQ) plot of the data shown in the circular Manhattan plots.



| Trait                                       | Abv. | $\sigma^2_u$ | H <sup>2</sup> |
|---------------------------------------------|------|--------------|----------------|
| Percentage of fiber in sugarcane bagasse    | FB   | 2.21         | 0.56           |
| Apparent percentage of sucrose in sugarcane | PC   | 2.02         | 0.71           |
| Tonnes of pol per hectare                   | TPH  | 7.48         | 0.58           |
| Tonnes of stalks per hectare                | TSH  | 389.98       | 0.57           |

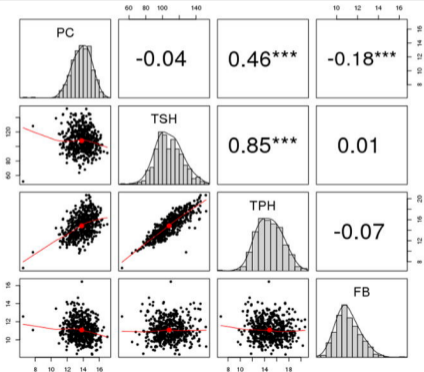

# WINDOWS

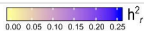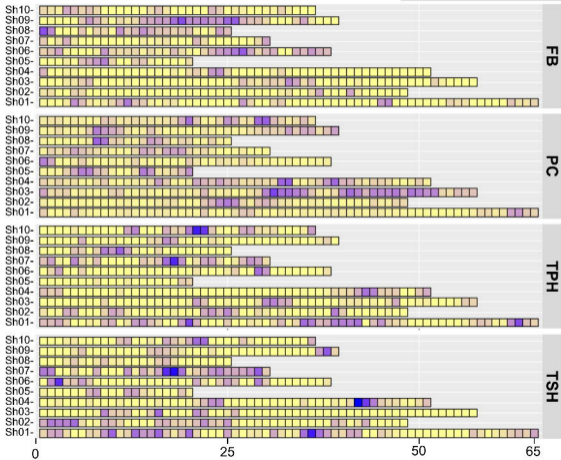

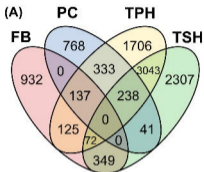

| Window | Chr  | Start    | End      | $h^2_r$ | $h^2_r/h^2_g$ | Genes |
|--------|------|----------|----------|---------|---------------|-------|
| w268   | Sh06 | 23227889 | 26181300 | 0.180   | 0.225         | 193   |
| w353   | Sh09 | 15928694 | 18340888 | 0.196   | 0.246         | 110   |
| w359   | Sh09 | 22026041 | 24621652 | 0.166   | 0.208         | 149   |
| w360   | Sh09 | 23221276 | 25294245 | 0.178   | 0.223         | 117   |
| w310*  | Sh07 | 29293193 | 30096520 | 0.192   | 0.241         | 51    |
| w310*  | Sh08 | 1        | 1012425  | 0.192   | 0.241         | 78    |

| Window | Chr  | Start    | End      | $h^2_r$ | $h^2_r/h^2_g$ | Genes |
|--------|------|----------|----------|---------|---------------|-------|
| w144   | Sh03 | 29786348 | 31787511 | 0.205   | 0.220         | 102   |
| w202   | Sh04 | 26497412 | 27954338 | 0.168   | 0.180         | 75    |
| w203   | Sh04 | 27214734 | 28914864 | 0.177   | 0.190         | 97    |
| w317   | Sh08 | 5810517  | 7836129  | 0.170   | 0.183         | 109   |
| w403   | Sh10 | 29066364 | 30862476 | 0.176   | 0.189         | 103   |

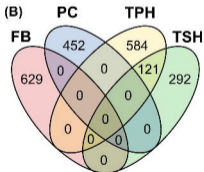

| Window      | Chr  | Start    | End      | $h^2_r$ | $h^2_r/h^2_g$ | Genes |
|-------------|------|----------|----------|---------|---------------|-------|
| w36         | Sh01 | 33316393 | 35318896 | 0.244   | 0.638         | 65    |
| w212        | Sh04 | 35574173 | 37971629 | 0.258   | 0.674         | 137   |
| w244        | Sh06 | 2033903  | 3698542  | 0.228   | 0.595         | 59    |
| w296        | Sh07 | 13845897 | 15811781 | 0.231   | 0.603         | 79    |
| <b>w297</b> | Sh07 | 14688970 | 17462449 | 0.253   | 0.661         | 121   |

| Window      | Chr  | Start    | End      | $h^2_r$ | $h^2_r/h^2_g$ | Genes |
|-------------|------|----------|----------|---------|---------------|-------|
| w20         | Sh01 | 16169530 | 18591486 | 0.206   | 0.556         | 116   |
| w63         | Sh01 | 66561582 | 70914509 | 0.199   | 0.538         | 347   |
| <b>w297</b> | Sh07 | 14688970 | 17462449 | 0.235   | 0.635         | 121   |
| w394        | Sh10 | 20759174 | 22907829 | 0.244   | 0.660         | 75    |
| w395        | Sh10 | 22127735 | 23707822 | 0.220   | 0.595         | 77    |

## FB

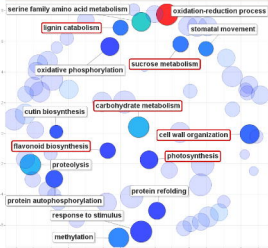

## PC

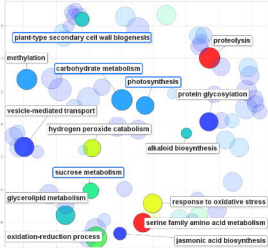

## TPH

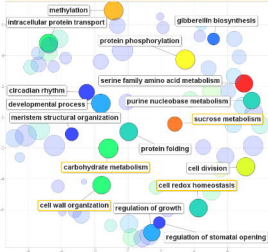

## TSH

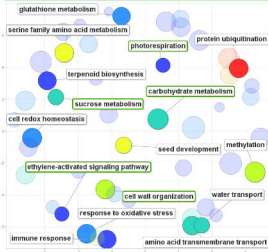

1 **Table 1. Summary of genotyping of analyzed sugarcane genotypes.** Capture  
2 sequencing data of 508 sugarcane genotypes were mapped to the reference genome and  
3 a variant calling analysis was performed with a SNP quality control (QC) process.  
4

| <b>Sugarcane chromosome</b> | <b>Length (Mb)</b> | <b>Number of Genes</b> | <b>Average of mapping coverage</b> | <b>Number of SNPs before QC</b> | <b>Number of SNPs after QC</b> |
|-----------------------------|--------------------|------------------------|------------------------------------|---------------------------------|--------------------------------|
| Sh01                        | 72.29              | 4,476                  | 1.88                               | 127,817                         | 59,783                         |
| Sh02                        | 52.64              | 3,178                  | 1.55                               | 95,999                          | 44,429                         |
| Sh03                        | 54.89              | 3,399                  | 1.46                               | 115,485                         | 52,545                         |
| Sh04                        | 45.58              | 2,791                  | 1.54                               | 101,102                         | 46,756                         |
| Sh05                        | 23.28              | 1,233                  | 1.14                               | 39,330                          | 17,993                         |
| Sh06                        | 35.41              | 2,108                  | 1.79                               | 74,477                          | 34,853                         |
| Sh07                        | 30.10              | 1,824                  | 1.38                               | 63,170                          | 27,829                         |
| Sh08                        | 24.32              | 1,307                  | 1.25                               | 49,150                          | 23,001                         |
| Sh09                        | 36.58              | 2,082                  | 1.32                               | 76,803                          | 35,419                         |
| Sh10                        | 34.65              | 1,943                  | 1.33                               | 71,654                          | 32,587                         |
| <b>Total</b>                | <b>408.94</b>      | <b>24,341</b>          | <b>1.46</b>                        | <b>814,987</b>                  | <b>375,195</b>                 |

5

1 **Table 2. Genes located at the top-5 windows with higher heritability and that are**  
 2 **related to carbon metabolism, starch and sucrose metabolism, and**  
 3 **phenylpropanoid biosynthesis pathways.** Genes which were assigned to the KEGG  
 4 ortholog groups (KOs) and mapped to the KEGG pathways of carbon metabolism  
 5 (CM), glycolysis and gluconeogenesis (GG), sucrose and starch metabolism (SSM),  
 6 phenylpropanoid biosynthesis (PB), and oxidative phosphorylation (OP).  
 7

| Trait | Gene(window)                                                     | KO     | Enzyme [EC number]                                                   | Pathway |
|-------|------------------------------------------------------------------|--------|----------------------------------------------------------------------|---------|
| FB    | Sh09_g008010(w353)                                               | K00029 | malate dehydrogenase [1.1.1.40]                                      | CM      |
| FB    | Sh06_g013660(w268)                                               | K00844 | hexokinase [2.7.1.1]                                                 | CM, SSM |
| FB    | Sh06_g013010(w268)                                               | K13065 | shikimate O-hydroxycinnamoyltransferase [2.3.1.133]                  | PB      |
| FB    | Sh09_g011980(w359/w360)                                          | K23260 | scopoletin glucosyltransferase [2.4.1.128]                           | PB      |
| PC    | Sh08_g004080(w317)                                               | K01623 | fructose-bisphosphate aldolase [4.1.2.13]                            | CM      |
| PC    | Sh04_g016390(w203)                                               | K01834 | phosphoglycerate mutase [5.4.2.11]                                   | CM      |
| PC    | Sh04_g015250(w202),<br>Sh04_g015260(w202)                        | K01900 | succinyl-CoA synthetase [6.2.1.4 6.2.1.5]                            | CM      |
| PC    | Sh08_g004580(w317)                                               | K02437 | glycine cleavage system H protein                                    | CM      |
| PC    | Sh06_g014550(w268),<br>Sh06_g014560(w268)                        | K01792 | glucose-6-phosphate 1-epimerase [5.1.3.15]                           | GG      |
| PC    | Sh03_g016860(w144)                                               | K02150 | V-type H <sup>+</sup> -transporting ATPase subunit E                 | OP      |
| PC    | Sh08_g003930(w317)                                               | K02155 | V-type H <sup>+</sup> -transporting ATPase 16kDa proteolipid subunit | OP      |
| PC    | Sh04_g016300(w203)                                               | K01087 | trehalose 6-phosphate phosphatase [3.1.3.12]                         | SSM     |
| PC    | Sh10_g015790(w403),<br>Sh10_g015810(w403)                        | K01187 | alpha-glucosidase [3.2.1.20]                                         | SSM     |
| PC    | Sh04_g015390(w202),<br>Sh04_g015400(w202),<br>Sh04_g015410(w202) | K10775 | phenylalanine ammonia-lyase [4.3.1.24]                               | PB      |
| PC    | Sh04_g015380(w202)                                               | K13064 | phenylalanine/tyrosine ammonia-lyase [4.3.1.25]                      | PB      |
| TPH   | Sh01_g042660(w063),<br>Sh01_g042670(w063)                        | K00640 | serine O-acetyltransferase [2.3.1.30]                                | CM      |
| TPH   | Sh01_g011250(w020)                                               | K00873 | pyruvate kinase [2.7.1.40]                                           | CM      |
| TPH   | Sh01_g042590(w063)                                               | K01681 | aconitate hydratase [4.2.1.3]                                        | CM      |
| TPH   | Sh10_g011930(w394/w395)                                          | K01738 | cysteine synthase [2.5.1.47]                                         | CM      |
| TPH   | Sh01_g042950(w063)                                               | K03781 | catalase [1.11.1.6]                                                  | CM      |
| TPH   | Sh10_g012040(w394/w395)                                          | K02147 | V-type H <sup>+</sup> -transporting ATPase subunit B                 | OP      |
| TPH   | Sh01_g042110(w063)                                               | K01177 | beta-amylase [3.2.1.2]                                               | SSM     |
| TPH   | Sh01_g041030(w063)                                               | K01904 | 4-coumarate--CoA ligase [6.2.1.12]                                   | PB      |
| TPH   | Sh10_g012300(w395)                                               | K12355 | coniferyl-aldehyde dehydrogenase [1.2.1.68]                          | PB      |
| TSH   | Sh01_g020340(w036)                                               | K00814 | alanine transaminase [2.6.1.2]                                       | CM      |
| TSH   | Sh01_g020380(w036)                                               | K01601 | ribulose-bisphosphate carboxylase large chain [4.1.1.39]             | CM      |
| TSH   | Sh01_g020520(w036)                                               | K00001 | alcohol dehydrogenase [1.1.1.1]                                      | GG      |
| TSH   | Sh01_g020600(w036)                                               | K01785 | aldose 1-epimerase [5.1.3.3]                                         | GG      |
| TSH   | Sh04_g021630(w212)                                               | K01087 | trehalose 6-phosphate phosphatase [3.1.3.12]                         | SSM     |
